# Supplementary material for: Exploring the decision-making process in model development: focus on the Arctic snowpack
Source: Copernicus journal article supplement (doi:10.5194/egusphere-2023-2926), 2024-01-02

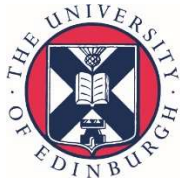

THE UNIVERSITY *of* EDINBURGH  
School of Geosciences

## Interview Consent Form

Research project title: A multi-perspective approach to snow model developments  
(part of EC H2020 CHARTER)

Research investigator: Dr Cecile Menard

Research Participant name:

You are being interviewed because of your expertise in:

Thank you for agreeing to be interviewed as part of the above research project. Ethical procedures for academic research undertaken from UK institutions require that interviewees explicitly agree to being interviewed and to how the information contained in their interview will be used. This consent form is necessary for us to ensure that you understand the purpose of your involvement and that you agree to the conditions of your participation. Would you therefore read the accompanying **information sheet** and then sign this form to certify that you approve the following:

- The interview will take between 30 and 45 minutes. We don't anticipate that there are any risks associated with your participation, but you have the right to stop the interview or withdraw from the research at any time.
- The interview will be recorded and real-time transcription enabled.
- Access to the interview transcript will be limited to the research team: Dr Menard, University of Edinburgh; Dr Sirpa Rasmus, University of Lapland; Dr Ioanna Merkouriadi, Finnish Meteorological Institute. The transcript will only be shared by Dr Menard with Dr Rasmus and/or Dr Merkouriadi if required for purposes of data analyses, and collaborative report writing / editing. You can request access to the transcript by contacting Dr Menard.
- As the accuracy of transcripts depends on many elocutionary factors (e.g. speed of delivery, articulation, accent), they will be checked and corrected within three weeks of the interview. The recordings will be deleted as soon as the transcripts have been checked.
- Any variation of the conditions above will only occur with your further explicit approval.
- Your words may be quoted in future publications or any other outputs stemming from this study, but will not be attributed to you. They may, however, be attributed to your group.

Your name will remain unknown to the other participants and you will not be informed of the other participants' names until all interviews have been conducted. After all interviews have been conducted and before any publication stemming from this study is submitted, another consent form will be sent to you ("I" in the following statements) and you will be asked to choose between the following "Identification" and "Transcript" options:

Identification:

1. I do not want my identity to be revealed to the other participants or in any publication.
2. I agree to my identity being known to the other participants, but not in any publication.
3. I agree to be named as a participant.
4. I agree to be a co-author in publications stemming from this study.

Transcript:

1. I agree to the full transcript of my interview being published in a data repository and to be identified.
2. I agree to the full transcript of my interview being published in a data repository, but not under my name.
3. I agree to an edited version of my transcript, which I will approve before submission, to be published in a data repository. I also agree to be identified.
4. I agree to an edited version of my transcript, which I will approve before submission, to be published in a data repository. I do not wish to be identified.
5. I do not agree to my transcript being published in a data repository.

By signing this form you ("I" in the following statements) agree that;

1. I am voluntarily taking part in this project. I understand that I do not have to take part, and I can stop the interview at any time.
2. The transcribed interview or extracts from it may be used as described above.
3. I have read the Information sheet.
4. I don't expect to receive any benefit or payment for my participation.
5. I can request a copy of the transcript of my interview.
6. I have been able to ask any questions I might have, and I understand that I am free to contact the researcher with any questions I may have in the future.
7. I will be asked to decide if and how I would like to be identified and if and how I would like my transcript to be shared after all interviews have been conducted. I will need to fill the consent form associated with these questions at a later stage.

---

**Printed Name**

---

**Participants Signature**

---

**Date**

---

**Researchers Signature**

---

**Date**

**Contact Information**

This research has been reviewed and approved by the Edinburgh University Research Ethics Board. If you have any further questions or concerns about this study, please contact:

Dr Cecile Menard  
School of Geosciences  
University of Edinburgh  
[Cecile.menard@ed.ac.uk](mailto:Cecile.menard@ed.ac.uk)

**What if I have concerns about this research?**

If you are worried about this research, or if you are concerned about how it is being conducted, you can contact the Chair of the GeoScience Ethics Committee, University of Edinburgh, Drummond St, Edinburgh, EH8 9XP (or email at [ethics.geos@ed.ac.uk](mailto:ethics.geos@ed.ac.uk) ).

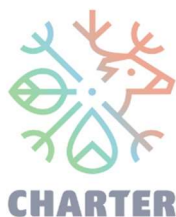

Supplement: Supplementary file 2 [file egusphere-2023-2926-supplement.zip]
